# Supplementary material for: Tick-borne encephalitis (TBE) cases are not random: explaining trend, low- and high-frequency oscillations based on the Austrian TBE time series
Source: Springer Nature journal article supplement (doi:10.1186/s12879-020-05156-7), 2020-06-26
Supplement: MOESM1 [file 18123210]

## Supplement 1

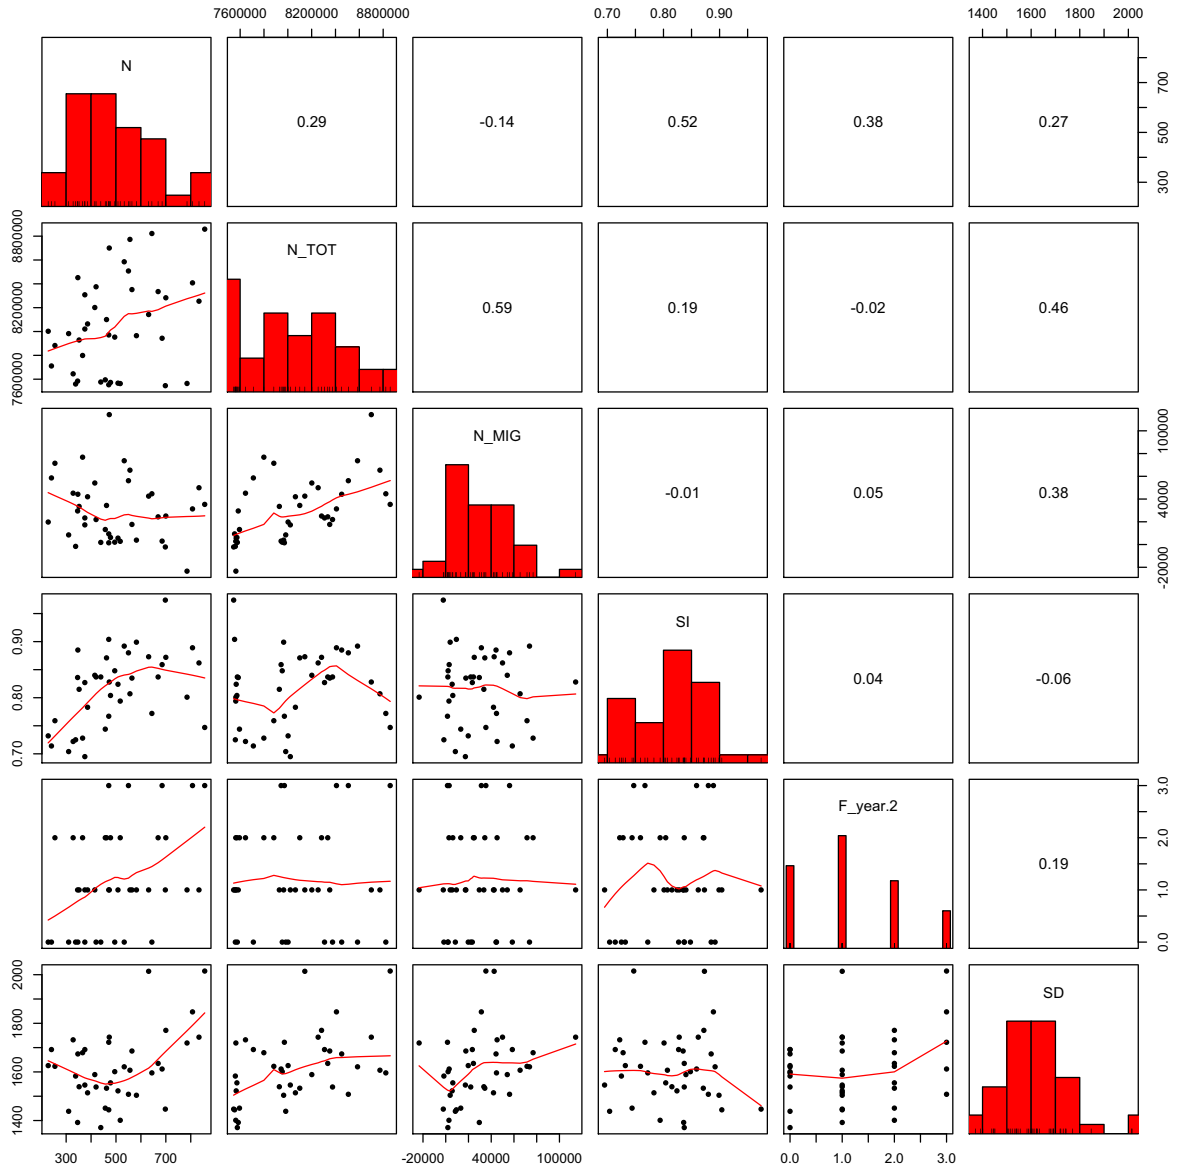

Figure S1: Frequency distributions (red bars) of the Austrian TBE incidence without vaccination  $N$  and the predictors used in the generalized linear models (GLMs): total human population  $N_{TOT}$ , net migration  $N_{MIG}$ , transformed Scandinavian index  $SI$ , beech fructification index 2 years prior  $F_{year-2}$  and, annual sunshine duration in hours  $SD$ . The following rank-order correlations with  $N$  have been determined:  $R=0.29$  ( $N_{TOT}$ ),  $R=-0.14$  ( $N_{MIG}$ ),  $R=0.52$  ( $SI$ ),  $R=0.38$  ( $F_{year-2}$ ), and  $R=0.27$  ( $SD$ ). Maximum collinearity of  $R=0.59$  ( $N_{TOT}$  vs.  $N_{MIG}$ ).

## Supplement 2

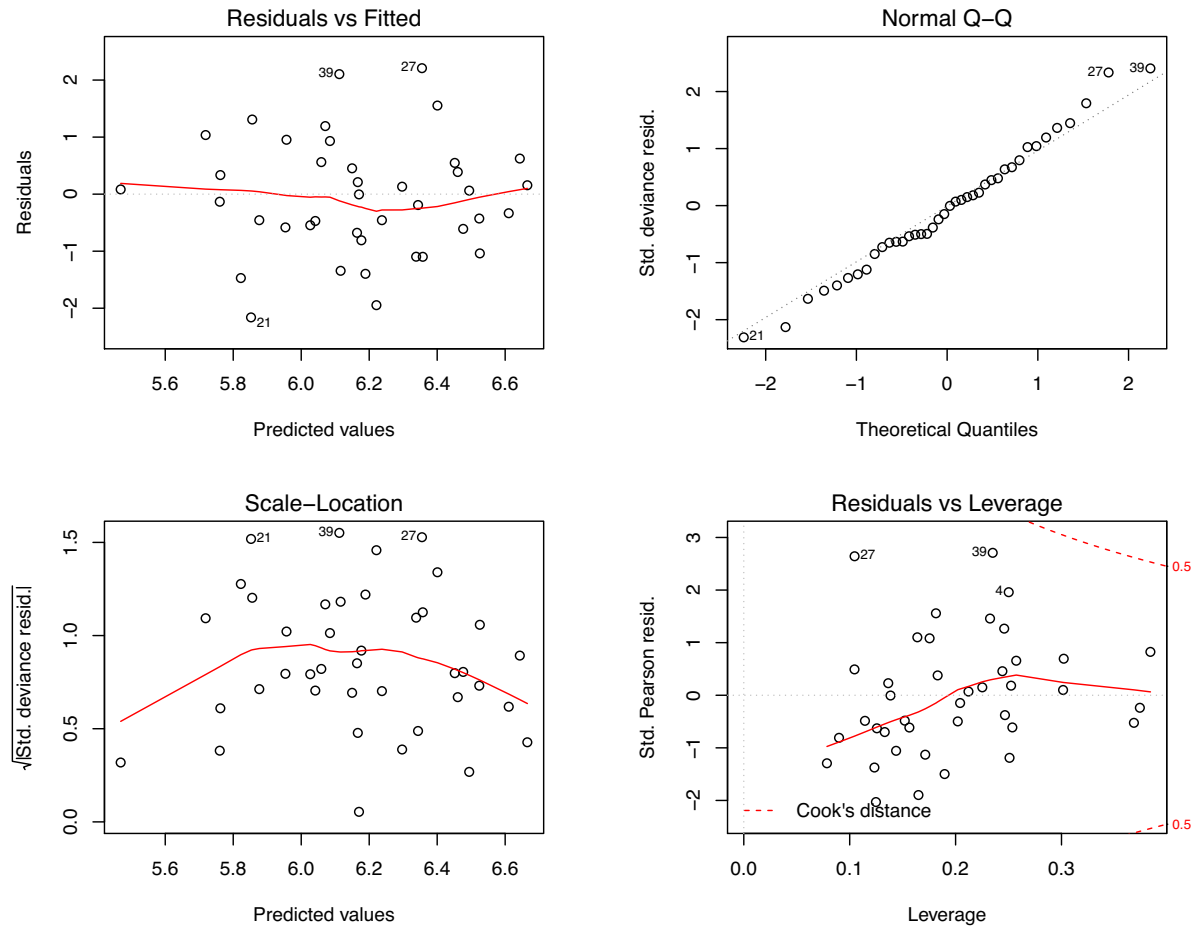

Figure S2: Statistical features of GLM4.

## Supplement 3

Table S1: Akaike information criterion (AIC) and explained variance ( $R_{adj}^2$ ) values for stepwise developed models GLM1–GLM4.

|      | AIC | $R_{adj}^2$ |
|------|-----|-------------|
| GLM1 | 519 | 0.10        |
| GLM2 | 501 | 0.48        |
| GLM3 | 490 | 0.66        |
| GLM4 | 487 | 0.70        |
